# Supplementary material for: An exploratory pilot study of the effect of modified hygiene kits on handwashing with soap among internally displaced persons in Ethiopia.
Source: Research Square preprint supplement (doi:10.21203/rs.3.rs-68391/v2), 2021-01-07
Supplement: Supplementary file [file d2498541f4264d5e42126847.pdf]

**Table 1: Observed handwashing prevalence across all study arms, disaggregated by action taken and critical time for handwashing (after defecation, before preparing food, before eating, before serving/feeding another person food, after cleaning a child's bottom) in a four arm exploratory pilot study in an internally displaced population in Moyale District, Ethiopia.**

|                                                                                                                                                                                  | Control arm<br>n=50 | Intervention Arm<br>1: Liquid<br>n=50 | Intervention Arm<br>2: Scented<br>n=51 | Intervention Arm<br>3: Mirror<br>n=52 |
|----------------------------------------------------------------------------------------------------------------------------------------------------------------------------------|---------------------|---------------------------------------|----------------------------------------|---------------------------------------|
| <b>Handwashing at all key times (after defecation, before preparing food, before eating, before serving/feeding another person food, after cleaning a child's bottom), n (%)</b> |                     |                                       |                                        |                                       |
| Did not wash hands                                                                                                                                                               | 38% (137)           | 41% (169)                             | 49% (187)                              | 46% (139)                             |
| Washed hands with water                                                                                                                                                          | 45% (162)           | 39% (158)                             | 41% (158)                              | 43% (130)                             |
| Washed hands with water and soap                                                                                                                                                 | 17% (63)            | 20% (82)                              | 10% (40)                               | 11% (33)                              |
| <b>After defecation, n (%)</b>                                                                                                                                                   |                     |                                       |                                        |                                       |
| Did not wash hands                                                                                                                                                               | 21% (22)            | 22% (24)                              | 33% (30)                               | 33% (25)                              |
| Washed hands with water                                                                                                                                                          | 48% (49)            | 42% (47)                              | 48% (43)                               | 43% (32)                              |
| Washed hands with water and soap                                                                                                                                                 | 31% (32)            | 36% (40)                              | 19% (17)                               | 24% (18)                              |
| <b>Before preparing food, n (%)</b>                                                                                                                                              |                     |                                       |                                        |                                       |
| Did not wash hands                                                                                                                                                               | 38% (21)            | 55% (30)                              | 52% (31)                               | 57% (30)                              |
| Washed hands with water                                                                                                                                                          | 54% (30)            | 29% (16)                              | 42% (25)                               | 42% (22)                              |

|                                                          |          |          |          |          |
|----------------------------------------------------------|----------|----------|----------|----------|
| Washed hands with water and soap                         | 9% (5)   | 16% (9)  | 7% (4)   | 2% (1)   |
| <b>Before eating, n (%)</b>                              |          |          |          |          |
| Did not wash hands                                       | 43% (55) | 53% (77) | 58% (81) | 41% (43) |
| Washed hands with water                                  | 47% (59) | 36% (52) | 36% (51) | 53% (56) |
| Washed hands with water and soap                         | 10% (13) | 12% (17) | 6% (8)   | 7% (7)   |
| <b>Before serving/feeding another person food, n (%)</b> |          |          |          |          |
| Did not wash hands                                       | 74% (35) | 52% (30) | 61% (37) | 61% (36) |
| Washed hands with water                                  | 23% (11) | 40% (23) | 36% (22) | 36% (12) |
| Washed hands with water and soap                         | 2% (1)   | 9% (5)   | 3% (2)   | 2% (1)   |
| <b>After cleaning a child's bottom, n (%)</b>            |          |          |          |          |
| Did not wash hands                                       | 14% (4)  | 21% (8)  | 24% (8)  | 26% (5)  |
| Washed hands with water                                  | 45% (13) | 51% (20) | 50% (17) | 42% (8)  |
| Washed hands with water and soap                         | 41% (12) | 28% (11) | 26% (9)  | 32% (6)  |
